# Supplementary material for: Design of an intermediate carbon layer between bimetallic sulfide and a carbon-based substrate for high-performance asymmetric supercapacitors
Source: Royal Society of Chemistry journal article supplement (doi:10.1039/c8nj02060d), 2018-01-01
Supplement: c8nj02060d1.pdf [file c8nj02060d1.pdf]

## Supplementary Information

### **Design of an intermediate carbon layer between bimetallic sulfide and carbon-based substrate for high-performance asymmetric supercapacitors**

Mengnan Hua<sup>1</sup>, Ting Chen<sup>1,2,\*</sup>, Houyi Ma<sup>1,\*</sup>

*<sup>1</sup>Key Laboratory for Colloid and Interface Chemistry of State Education Ministry, School of Chemistry and Chemical Engineering, Shandong University, Jinan 250100, Shandong, China*

*<sup>2</sup>School of Science, Shandong Jianzhu University, Jinan 250101, Shandong, China*

\*Corresponding author.

Tel: +86-531-88364959; Fax: +86-531-88564464;

E-mail: [hyma@sdu.edu.cn](mailto:hyma@sdu.edu.cn)(H. Ma); [chenting@sdjzu.edu.cn](mailto:chenting@sdjzu.edu.cn)(T. Chen)

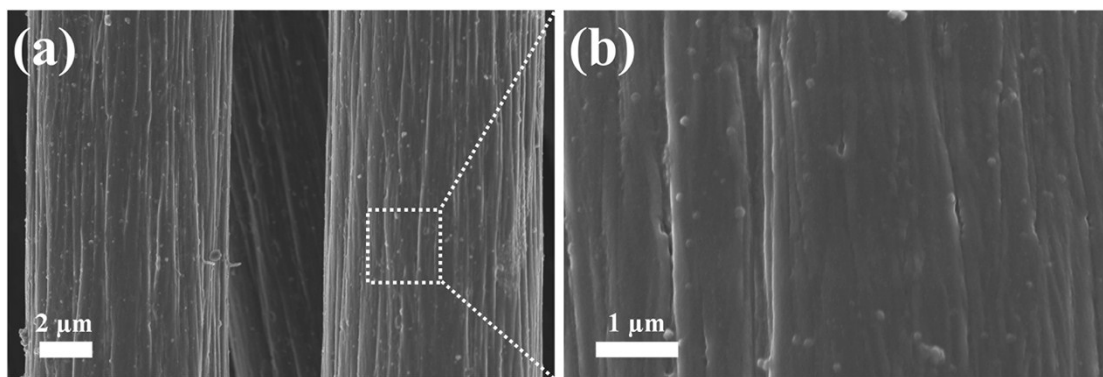

**Fig. S1** SEM images of the CC-NPC sample before annealing .

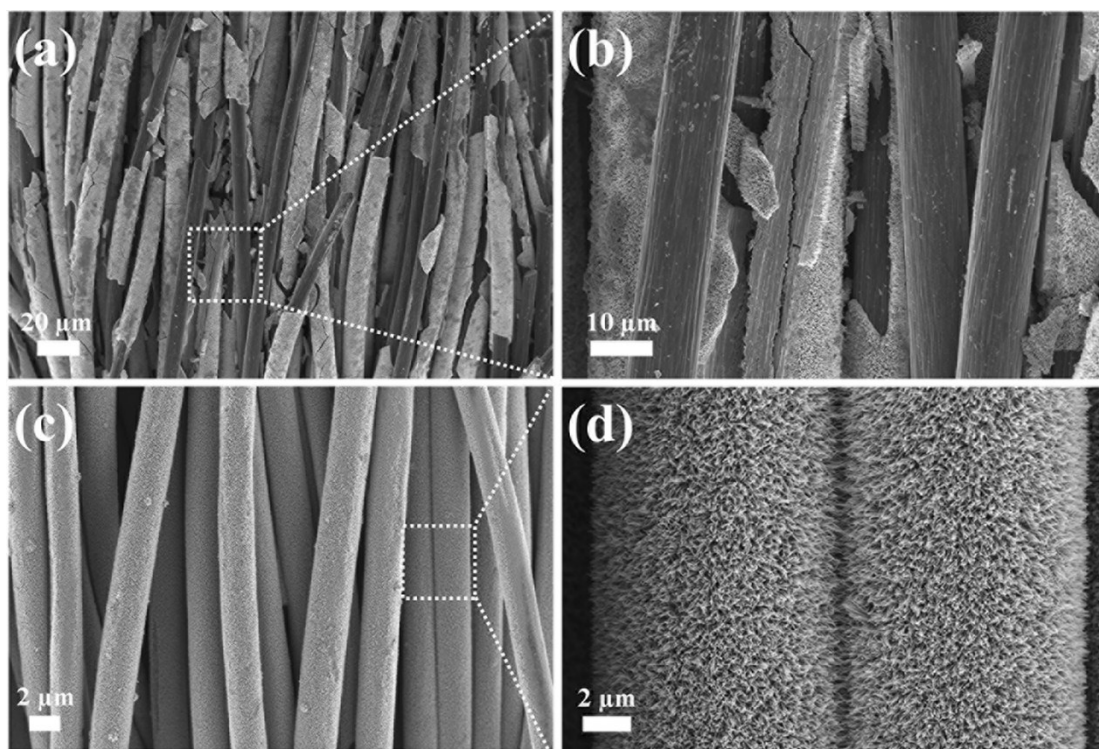

**Fig. S2** SEM images of (a, b) the CC-BS sample after 5 min sonication treatment; (c, d) the CC-NPC-BS sample after 15 min sonication treatment.

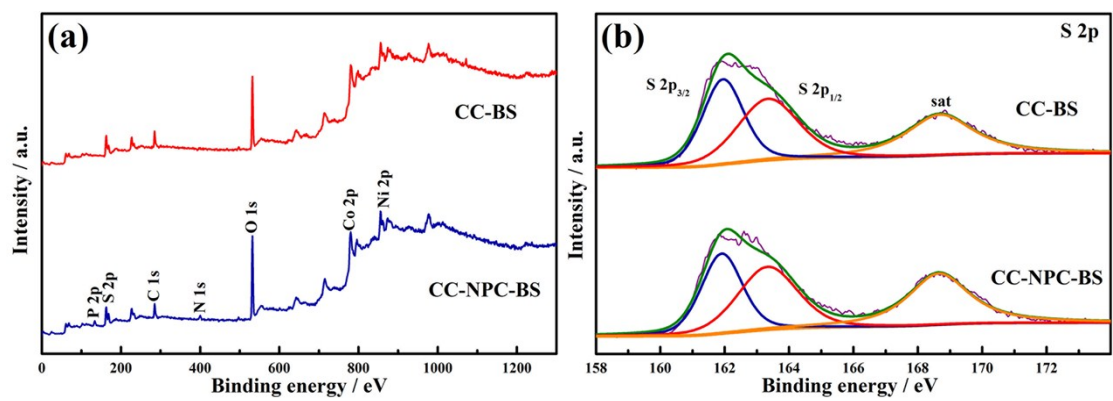

**Fig. S3** (a) XPS survey spectra of CC-BS and CC-NPC-BS samples; (b) high-resolution XPS spectra of S 2p for the CC-BS and CC-NPC-BS samples.

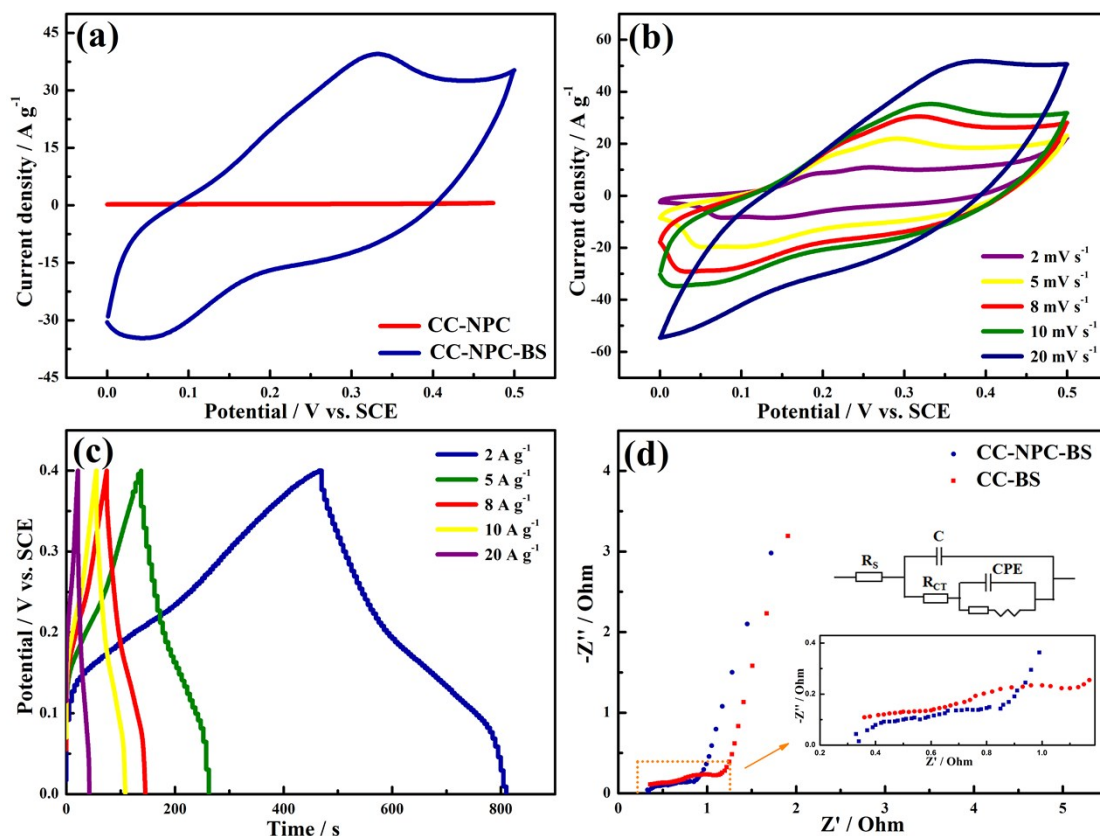

**Fig. S4** (a) CV curves of the CC-NPC and CC-NPC-BS electrodes at  $5 \text{ mV s}^{-1}$ ; (b) CV curves of the CC-BS electrode at different scan rates ranging from  $2$  to  $20 \text{ mV s}^{-1}$ ; (c) galvanostatic charge/discharge curves CC-BS electrode at various current densities ranging from  $2$  to  $20 \text{ A g}^{-1}$ ; (d) Nyquist impedance spectra and equivalent circuit of the CC-BS and CC-NPC-BS electrodes.

**Table S1**

EIS simulation parameters of CC-NPC-BS and CC-BS electrodes.

|           | $R_s$ ( $\Omega \cdot \text{cm}^2$ ) | $R_{CT}$ ( $\Omega \cdot \text{cm}^2$ ) | $C$ ( $\text{F} \cdot \text{cm}^{-2}$ ) | $\text{CPE}$ ( $\text{F} \cdot \text{cm}^{-2}$ ) |
|-----------|--------------------------------------|-----------------------------------------|-----------------------------------------|--------------------------------------------------|
| CC-NPC-BS | 0.3341                               | 0.4669                                  | $5.659 \times 10^{-4}$                  | $5.961 \times 10^{-2}$                           |
| CC-BS     | 0.3621                               | 0.6559                                  | $7.115 \times 10^{-4}$                  | $5.695 \times 10^{-2}$                           |

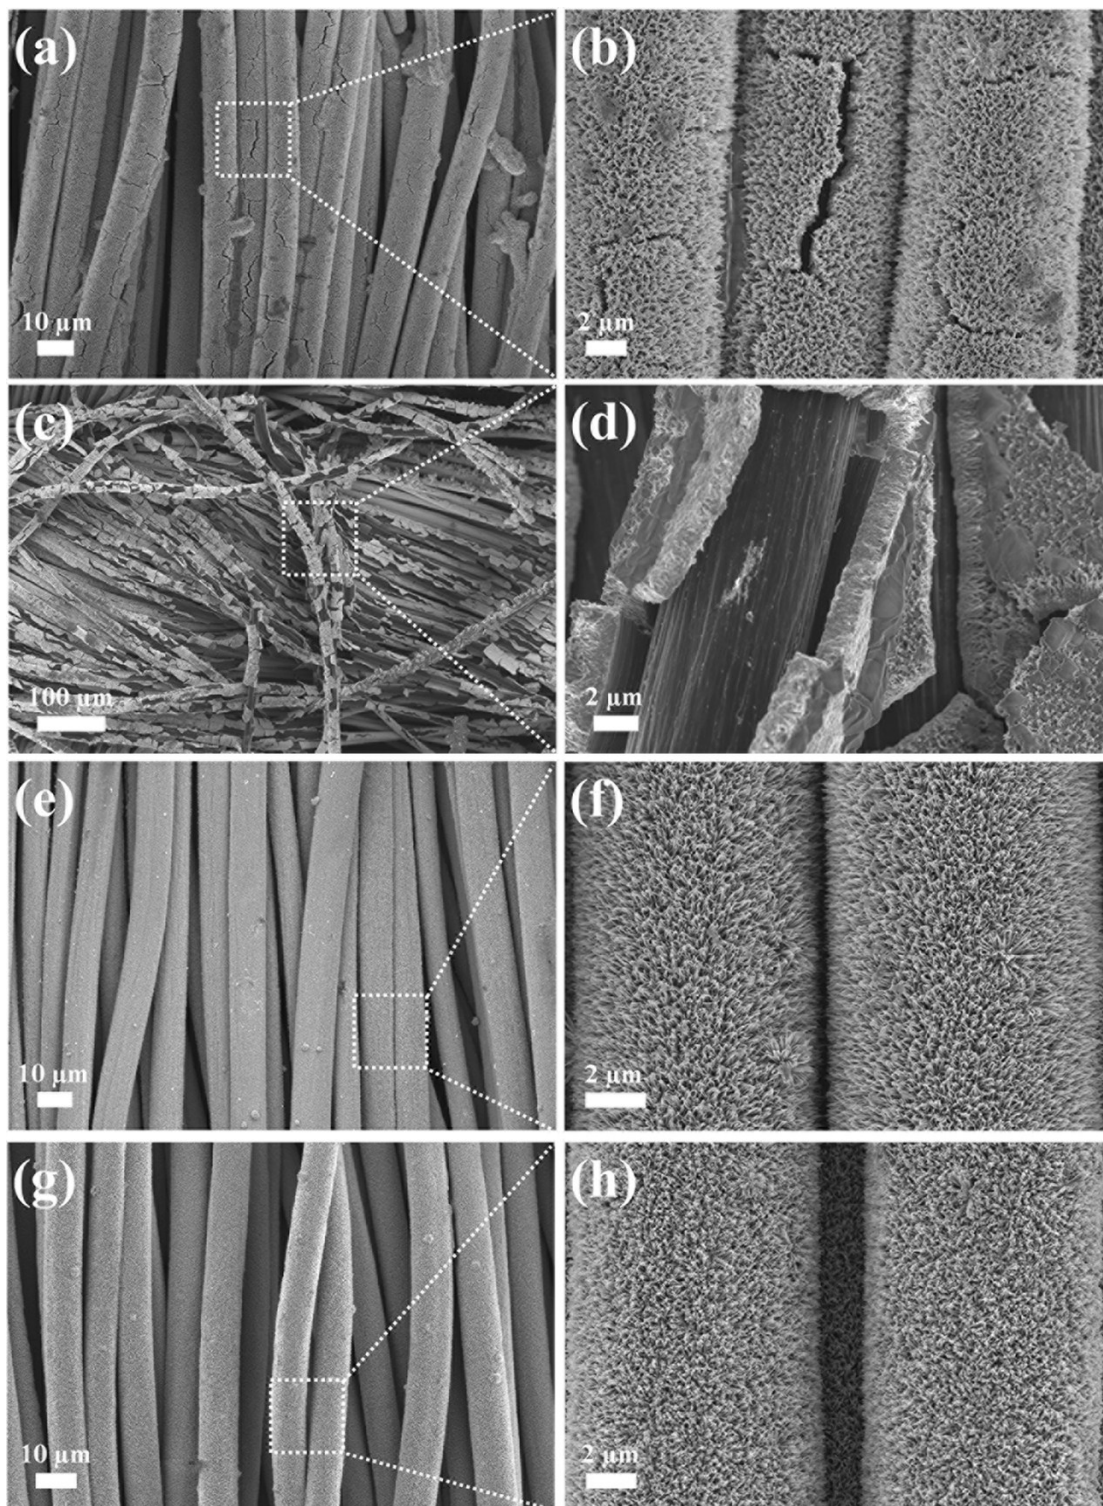

**Fig. S5** SEM images of the CC-BS sample before (a, b) and after (c, d) 1000 cycles at  $10 \text{ A g}^{-1}$ ; the CC-NPC-BS sample before (e, f) and after (g, h) 10000 cycles at  $10 \text{ A g}^{-1}$ .

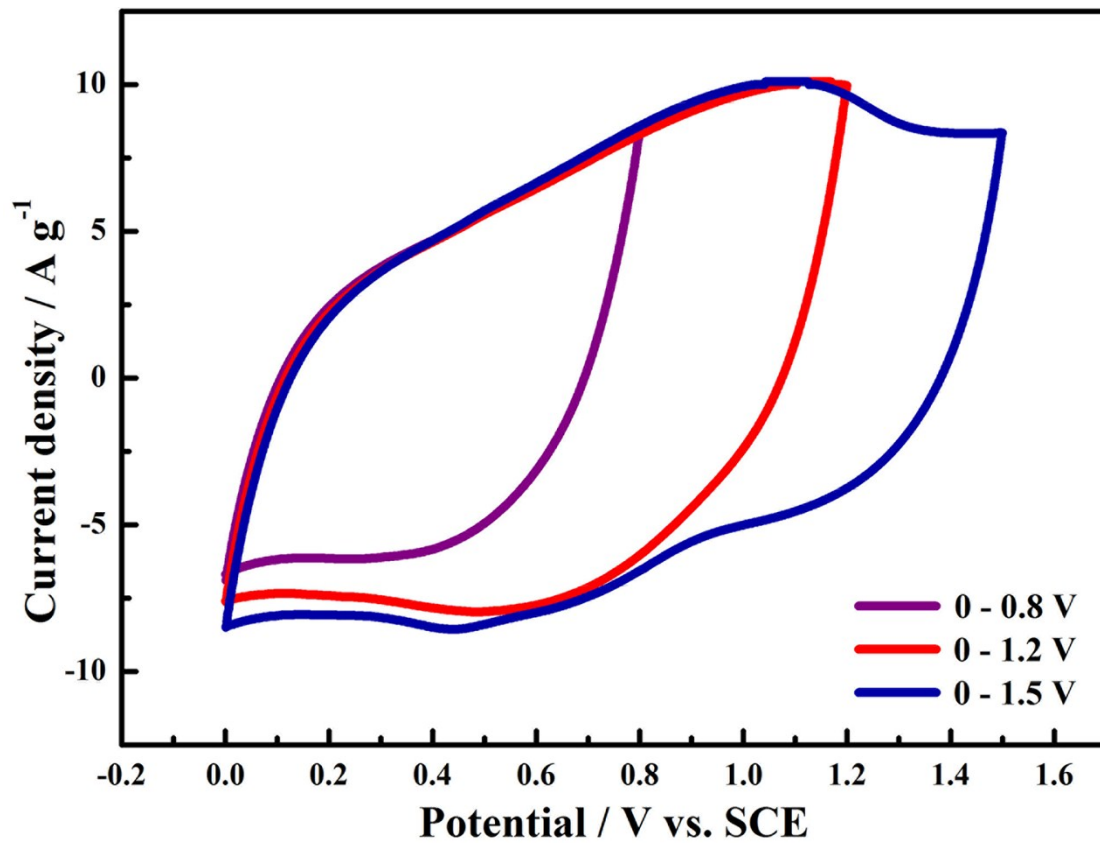

**Fig. S6** CV curves of CC-NPC-BS // AC asymmetric supercapacitor in various voltage windows at 5 mV s<sup>-1</sup>.
